# Supplementary material for: Clostridium difficile Lipoprotein GerS Is Required for Cortex Modification and Thus Spore Germination
Source: PubMed Central journal article supplement (PMC6021603; doi:10.1128/msphere.00205-18), 2018-06-27

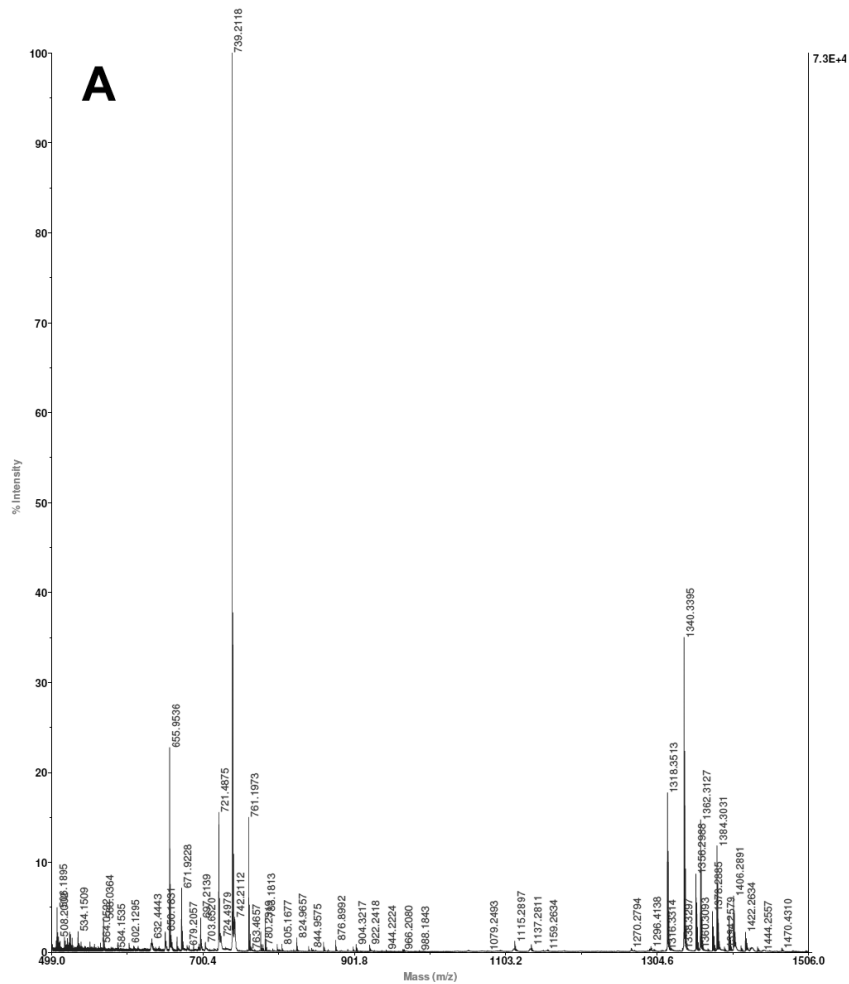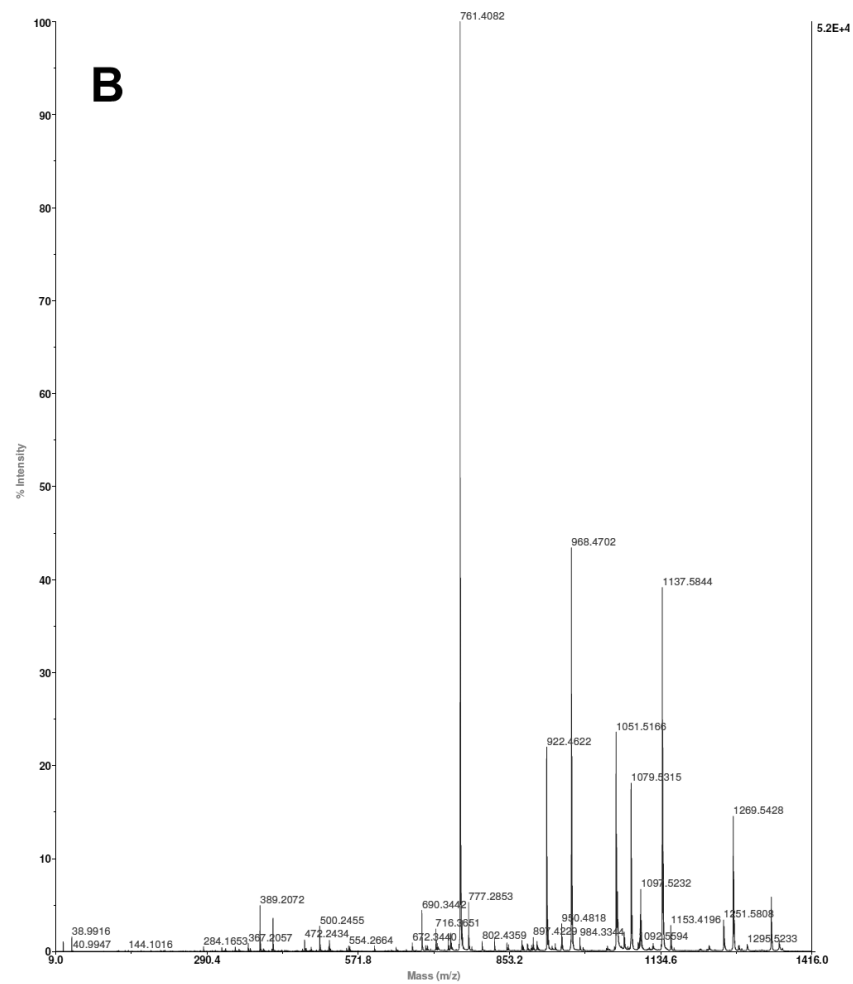

Supplement: sph003182575sf6.pdf [file sph003182575sf6.pdf]
