# Supplementary material for: Clostridium difficile Lipoprotein GerS Is Required for Cortex Modification and Thus Spore Germination
Source: PubMed Central journal article supplement (PMC6021603; doi:10.1128/msphere.00205-18), 2018-06-27
Supplement: sph003182575st1.pdf [file sph003182575st1.pdf]

**Table S1. MS-MS analyses of muuropeptide structures**

| Peak | Parent ion Na <sup>+</sup> m/z | Muropeptide Structure    | MS/MS Fragment Na <sup>+</sup> m/z | Fragment neutral loss | Fragment structure loss       | Fragment structure remaining    |
|------|--------------------------------|--------------------------|------------------------------------|-----------------------|-------------------------------|---------------------------------|
| 1    | 999.2                          | NAG-NAM-NAG-NAMoh        | 927.4                              | 71.8                  | Lactyl group of NAM           | NAG-NAG-NAG-NAMoh               |
|      |                                |                          | 796.4                              | 202.8                 | NAG                           | NAM-NAG-NAMoh                   |
|      |                                |                          | 704.3                              | 294.9                 | NAMoh and HO <sup>1</sup>     | NAG-NAM-NAGanhydro <sup>1</sup> |
|      |                                |                          | 521.3                              | 477.9                 | NAG-NAM                       | NAG-NAMoh                       |
|      |                                |                          | 501.3                              | 497.9                 | NAG-NAMoh and HO <sup>1</sup> | NAG-NAManhydro <sup>1</sup>     |
| 2    | 964.3                          | DS-TP                    | 893.2                              | 71.1                  | Ala                           | DS-TriP                         |
|      |                                |                          | 761.2                              | 203.1                 | NAG                           | NAMoh-TP                        |
|      |                                |                          | 592.2                              | 372.1                 | Glu-Dpm-Ala                   | DS-Ala                          |
| 3    | 922.3                          | DS-TP deacetylated       | 851.2                              | 71.1                  | Ala                           | DS-TriP deacetylated            |
|      |                                |                          | 761.2                              | 161.1                 | GlucN                         | NAMoh-TP                        |
|      |                                |                          | 550.1                              | 372.2                 | Glu-Dpm-Ala                   | DS-Ala deacetylated             |
| 4    | 721.2                          | DS-DiP                   | 592.2                              | 129                   | Glu                           | DS-Ala                          |
|      |                                |                          | 518.2                              | 203                   | NAG                           | NAMoh-DiP                       |
|      |                                |                          | 389.2                              | 332                   | NAG and Glu                   | NAMoh-Ala                       |
| 5    | 679.2                          | DS-DiP deacetylated      | 550.2                              | 129                   | Glu                           | DS-Ala deacetylated             |
|      |                                |                          | 518.2                              | 161                   | GlucN                         | NAMoh-DiP                       |
|      |                                |                          | 389.1                              | 290.1                 | GlucN and Glu                 | NAMoh-Ala                       |
| 6    | 1400.3                         | GlucN-NAM-NAG-NAMoh-TP   | 1328.5                             | 71.8                  | Lactyl group of NAM           | GlucN-NAG-NAG-NAMoh-TP          |
|      |                                |                          | 1239.5                             | 160.8                 | GlucN                         | NAM-NAG-NAMoh-TP                |
|      |                                |                          | 1028.4                             | 371.9                 | Glu-Dpm-Ala                   | GlucN-NAM-NAG-NAMoh-Ala         |
|      |                                |                          | 964.4                              | 435.9                 | GlucN-NAM                     | DS-TP                           |
|      |                                |                          | 761.4                              | 638.9                 | GlucN-NAM-NAG                 | NAMoh-TP                        |
|      |                                |                          | 592.3                              | 808                   | GlucN-NAM and Glu-Dpm-Ala     | DS-Ala                          |
| 7    | 1358.3                         | GlucN-NAM-GlucN-NAMoh-TP | 1286.5                             | 71.8                  | Lactyl group of NAM           | GlucN-NAG-GlucN-NAMoh-TP        |
|      |                                |                          | 1197.5                             | 160.8                 | GlucN                         | NAM-GlucN-NAMoh-TP              |
|      |                                |                          | 986.5                              | 371.8                 | Glu-Dpm-Ala                   | GlucN-NAM-GlucN-NAMoh-Ala       |
|      |                                |                          | 922.5                              | 435.8                 | GlucN-NAM                     | DS-TP deacetylated              |
|      |                                |                          | 761.4                              | 596.9                 | GlucN-NAM-GlucN               | NAMoh-TP                        |
|      |                                |                          | 550.3                              | 808                   | GlucN-NAM and Glu-Dpm-Ala     | DS-Ala deacetylated             |

|    |        |                          |        |        |                                                         |                                         |
|----|--------|--------------------------|--------|--------|---------------------------------------------------------|-----------------------------------------|
| 8  | 1400.9 | NAG-NAM-GlucN-NAMoh-TP   | 1328.3 | 72.6   | Lactyl group of NAM                                     | NAG-NAG-GlucN-NAMoh-TP                  |
|    |        |                          | 1197.3 | 203.6  | NAG                                                     | NAM-GlucN-NAMoh-TP                      |
|    |        |                          | 1028.3 | 372.6  | Glu-Dpm-Ala                                             | NAG-NAM-GlucN-NAMoh-Ala                 |
|    |        |                          | 922.3  | 478.6  | NAG-NAM                                                 | GlucN-NAMoh-TP                          |
|    |        |                          | 761.2  | 639.7  | GlucN-NAM-NAG                                           | NAMoh-TP                                |
| 9  | 1887.7 | DS-TP-TP-DS              | 1816.5 | 71.2   | Ala                                                     | DS-TP-TriP-DS                           |
|    |        |                          | 1684.5 | 203.2  | NAG                                                     | NAMoh-TP-TP-DS                          |
|    |        |                          | 1336.5 | 551.2  | NAG-NAMoh-Ala -H <sub>2</sub> O <sup>2</sup>            | DS-TP-Ala-Dpm-Glu <sup>2</sup>          |
|    |        |                          | 1207.5 | 680.2  | NAG-NAMoh-Ala-Glu -H <sub>2</sub> O <sup>2</sup>        | DS-TP-Ala-Dpm <sup>2</sup>              |
|    |        |                          | 964.4  | 923.3  | DS-TP                                                   | DS-TP                                   |
|    |        |                          | 592.2  | 1295.5 | DS-TP-TriP                                              | DS-Ala                                  |
| 10 | 1845.7 | DS-TP-TP-DS deacetylated | 1774.3 | 71.4   | Ala                                                     | DS-TP-TriP-DS deacetylated              |
|    |        |                          | 1684.5 | 161.2  | GlucN                                                   | DS-TP-TP-NAMoh                          |
|    |        |                          | 1642.5 | 203.2  | NAG                                                     | NAMoh-TP-TP-DS deacetylated             |
|    |        |                          | 1481.5 | 364.2  | GlucN and NAG                                           | NAMoh-TP-TP-NAM                         |
|    |        |                          | 1336.4 | 509.3  | GlucN-NAMoh-Ala -H <sub>2</sub> O <sup>2</sup>          | DS-TP-Ala-Dpm-Glu <sup>2</sup>          |
|    |        |                          | 1294.4 | 551.3  | DS-Ala -H <sub>2</sub> O <sup>2</sup>                   | GlucN-NAMoh-TP-Ala-Dpm-Glu <sup>2</sup> |
|    |        |                          | 1207.5 | 638.2  | GlucN-NAMoh-Ala-Glu -H <sub>2</sub> O <sup>2</sup>      | DS-TP-Ala-Dpm <sup>2</sup>              |
|    |        |                          | 1165.5 | 680.2  | DS-Ala-Glu -H <sub>2</sub> O <sup>2</sup>               | GlucN-NAMoh-TP-DiP <sup>2</sup>         |
|    |        |                          | 1004.4 | 841.3  | DS-Ala-Glu -H <sub>2</sub> O <sup>2</sup> -GlucN        | NAMoh-TP-Ala-Dpm <sup>2</sup>           |
|    |        |                          | 964.4  | 881.3  | GlucN-NAMoh-TP                                          | DS-TP                                   |
|    |        |                          | 592.2  | 1253.5 | DS-TP-TriP                                              | DS-Ala                                  |
| 11 | 1845.7 | DS-TP-TP-DS deacetylated | 1774.5 | 71.2   | Ala                                                     | DS-TP-TriP-DS deacetylated              |
|    |        |                          | 1684.5 | 161.2  | GlucN                                                   | DS-TP-TP-NAMoh                          |
|    |        |                          | 1642.5 | 203.2  | NAG                                                     | NAMoh-TP-TP-DS deacetylated             |
|    |        |                          | 1481.5 | 364.2  | GlucN and NAG                                           | NAMoh-TP-TP-NAMoh                       |
|    |        |                          | 1336.4 | 509.3  | GlucN-NAMoh-Ala -H <sub>2</sub> O <sup>2</sup>          | DS-TP-Ala-Dpm-Glu <sup>2</sup>          |
|    |        |                          | 1294.4 | 551.3  | NAG-NAMoh-Ala -H <sub>2</sub> O <sup>2</sup>            | GlucN-NAMoh-TP-Ala-Dpm-Glu <sup>2</sup> |
|    |        |                          | 1207.4 | 638.3  | GlucN-NAMoh-Ala-Glu -H <sub>2</sub> O <sup>2</sup>      | DS-TP-Ala-Dpm <sup>2</sup>              |
|    |        |                          | 1165.4 | 680.3  | NAG-NAMoh-Ala-Glu -H <sub>2</sub> O <sup>2</sup>        | GlucN-NAMoh-TP-DiP <sup>2</sup>         |
|    |        |                          | 1004.4 | 841.3  | NAG-NAMoh-Ala-Glu -H <sub>2</sub> O <sup>2</sup> -GlucN | NAMoh-TP-DiP <sup>2</sup>               |
|    |        |                          | 964.4  | 881.3  | GlucN-NAMoh-TP                                          | DS-TP                                   |
|    |        |                          | 592.2  | 1253.5 | DS-TP- Ala-Dpm-Glu                                      | DS-Ala                                  |

|    |        |                       |        |       |               |                      |
|----|--------|-----------------------|--------|-------|---------------|----------------------|
| 12 | 1340.3 | TS-TP<br>deacetylated | 1269.5 | 70.8  | Ala           | TS-TriP deacetylated |
|    |        |                       | 1137.6 | 202.7 | NAG           | MAL-GlucN-NAMoh-TP   |
|    |        |                       | 968.5  | 371.8 | Glu-Dpm-Ala   | TS-Ala deacetylated  |
|    |        |                       | 761.4  | 578.9 | NAG-MAL-GlucN | NAMoh-TP             |

- 1 Fragmentation to remove the reducing end sugar appears to result in the loss of OH and the formation of an anhydro sugar on the remaining ion.
- 2 Fragmentation within cross-linked peptides seems to often result in cyclization within the remaining peptide and loss of an H<sub>2</sub>O.
- 3 Abbreviations: DS =NAG-NAMoh; TS = NAG-MAL-NAG-NAMoh; GlucN =Deacetylated NAG (glucosamine)(Deacetylation is always on NAG); DiP = Ala-Glu; TriP = Ala-Glu-Dpm; TP = Ala-Glu-Dpm-Ala; NAM that has lost 71.8 Da lactyl group becomes NAG.
