# Supplementary material for: Clostridium difficile Lipoprotein GerS Is Required for Cortex Modification and Thus Spore Germination
Source: PubMed Central journal article supplement (PMC6021603; doi:10.1128/msphere.00205-18), 2018-06-27
Supplement: sph003182575st2.pdf [file sph003182575st2.pdf]

**Table S2. Strains and plasmids used in this study**

| Strain #                                                              | Strain name                                                              | Relevant genotype or features                                                                                                                                                                                           | Source/reference |
|-----------------------------------------------------------------------|--------------------------------------------------------------------------|-------------------------------------------------------------------------------------------------------------------------------------------------------------------------------------------------------------------------|------------------|
| <b><i>C. difficile</i> strains – 630<math>\Delta</math><i>erm</i></b> |                                                                          |                                                                                                                                                                                                                         |                  |
| 756                                                                   | 630 $\Delta$ <i>erm</i> $\Delta$ <i>pyrE</i>                             | <i>erm</i> -sensitive deriviate of 630 with a deletion in <i>pyrE</i>                                                                                                                                                   | [1]              |
| 846                                                                   | 630 $\Delta$ <i>erm</i> -p                                               | <i>erm</i> -sensitive deriviate of 630 with <i>pyrE</i> restored                                                                                                                                                        | [2]              |
| 849                                                                   | 630 $\Delta$ <i>erm</i> $\Delta$ <i>spo0A</i> -p                         | 630 $\Delta$ <i>erm</i> $\Delta$ <i>spo0A</i> with <i>pyrE</i> restored                                                                                                                                                 | [2]              |
| 925                                                                   | 630 $\Delta$ <i>erm</i> $\Delta$ <i>sleC</i> -p                          | 630 $\Delta$ <i>erm</i> $\Delta$ <i>sleC</i> with <i>pyrE</i> restored                                                                                                                                                  | [2]              |
| 950                                                                   | 630 $\Delta$ <i>erm</i> $\Delta$ <i>gerS</i> $\Delta$ <i>pyrE</i>        | 630 $\Delta$ <i>erm</i> $\Delta$ <i>pyrE</i> with <i>gerS</i> deleted ( <i>CD630_34640</i> )                                                                                                                            | This study       |
| 1075                                                                  | 630 $\Delta$ <i>erm</i> $\Delta$ <i>gerS</i> -p                          | 630 $\Delta$ <i>erm</i> $\Delta$ <i>gerS</i> with <i>pyrE</i> restored                                                                                                                                                  | This study       |
| 1084                                                                  | 630 $\Delta$ <i>erm</i> $\Delta$ <i>gerS</i> / <i>gerS</i> *             | 630 $\Delta$ <i>erm</i> $\Delta$ <i>gerS</i> with <i>gerS</i> in the <i>pyrE</i> locus                                                                                                                                  | [3]              |
| 1611                                                                  | 630 $\Delta$ <i>erm</i> $\Delta$ <i>pdaA</i> $\Delta$ <i>pyrE</i>        | 630 $\Delta$ <i>erm</i> $\Delta$ <i>pyrE</i> with <i>pdaA</i> deleted ( <i>CD630_14300</i> )                                                                                                                            | This study       |
| 1617                                                                  | 630 $\Delta$ <i>erm</i> $\Delta$ <i>cwlD</i> $\Delta$ <i>pyrE</i>        | 630 $\Delta$ <i>erm</i> $\Delta$ <i>pyrE</i> with <i>cwlD</i> deleted ( <i>CD630_01060</i> )                                                                                                                            | This study       |
| 1677                                                                  | 630 $\Delta$ <i>erm</i> $\Delta$ <i>gerS</i> / <i>gerS</i>               | 630 $\Delta$ <i>erm</i> $\Delta$ <i>gerS</i> with <i>gerS</i> - <i>alr2</i> in the <i>pyrE</i> locus                                                                                                                    | This study       |
| 1686                                                                  | 630 $\Delta$ <i>erm</i> $\Delta$ <i>cwlD</i> -p                          | 630 $\Delta$ <i>erm</i> $\Delta$ <i>cwlD</i> with <i>pyrE</i> restored                                                                                                                                                  | This study       |
| 1689                                                                  | 630 $\Delta$ <i>erm</i> $\Delta$ <i>pdaA</i> -p                          | 630 $\Delta$ <i>erm</i> $\Delta$ <i>pdaA</i> with <i>pyrE</i> restored                                                                                                                                                  | This study       |
| 1692                                                                  | 630 $\Delta$ <i>erm</i> $\Delta$ <i>cwlD</i> / <i>cwlD</i>               | 630 $\Delta$ <i>erm</i> $\Delta$ <i>cwlD</i> with <i>cwlD</i> in the <i>pyrE</i> locus                                                                                                                                  | This study       |
| 1695                                                                  | 630 $\Delta$ <i>erm</i> $\Delta$ <i>pdaA</i> / <i>pdaA</i>               | 630 $\Delta$ <i>erm</i> $\Delta$ <i>pdaA</i> with <i>pdaA</i> in the <i>pyrE</i> locus                                                                                                                                  | This study       |
| <b><i>E. coli</i> strains</b>                                         |                                                                          |                                                                                                                                                                                                                         |                  |
| 41                                                                    | DH5 $\alpha$                                                             | F <sup>-</sup> $\Phi$ 80 <i>lacZ</i> $\Delta$ M15 $\Delta$ ( <i>lacZYA</i> - <i>argF</i> ) U169 <i>recA1 endA1 hsdR17</i> (rK <sup>-</sup> , mK <sup>+</sup> ) <i>phoA supE44</i> $\lambda$ - <i>thi-1 gyrA96 relA1</i> | D. Cameron       |
| 531                                                                   | HB101/pRK24                                                              | F <sup>-</sup> <i>mcrB mrr hsdS20</i> (rB <sup>-</sup> mB <sup>-</sup> ) <i>recA13 leuB6 ara-13 proA2 lavYI galK2 xyl-6 mtl-1 rpsL20</i> carrying pRK24                                                                 | C. Ellermeier    |
| 892                                                                   | BL21 (DE3)                                                               | F <sup>-</sup> <i>ompT hsdSB</i> (rB <sup>-</sup> mB <sup>-</sup> ) <i>gal dcm</i> (DE3)                                                                                                                                | C. Ellermeier    |
| 1338                                                                  | pET22b- <i>pdaA</i>                                                      | pET22b- <i>pdaA</i> in BL21(DE3)                                                                                                                                                                                        | This study       |
| 1375                                                                  | pET28a- <i>cspBA</i> +TAA                                                | pET28a- <i>cspBA</i> including its stop codon in DH5 $\alpha$                                                                                                                                                           | This study       |
| 1539                                                                  | pMTL-YN3                                                                 | pMTL-YN3 in DH5 $\alpha$                                                                                                                                                                                                | [1]              |
| 1604                                                                  | pET29a- $\Delta$ 22- <i>gerS</i>                                         | pET29a- <i>gerS</i> (deletion of N-terminal 26 aa) in DH5 $\alpha$                                                                                                                                                      | [3]              |
| 1617                                                                  | pET22b-empty vector + pET29a- $\Delta$ 22- <i>gerS</i> +TAA              | Co-expression of pET22b empty vector with pET29a- <i>gerS</i> +TAA (untagged deletion of N-terminal 26 aa) in BL21(DE3)                                                                                                 | This study       |
| 1660                                                                  | pMTL-YN3- $\Delta$ <i>sleC</i>                                           | pMTL-YN3- $\Delta$ <i>sleC</i> in HB101/pRK24                                                                                                                                                                           | [2]              |
| 1662                                                                  | pMTL-YN1C                                                                | pMTL-YN1C in HB101/pRK24                                                                                                                                                                                                | [1]              |
| 1747                                                                  | pMTL-YN1C- <i>gerS</i> *                                                 | pMTL-YN1C- <i>gerS</i> in HB101/pRK24                                                                                                                                                                                   | This study       |
| 1933                                                                  | pMTL-YN1C- <i>gerS</i>                                                   | pMTL-YN1C- <i>gerS</i> - <i>alr2</i> in HB101/pRK24                                                                                                                                                                     | This study       |
| 1941                                                                  | pMTL-YN3- $\Delta$ <i>cwlD</i>                                           | pMTL-YN3- $\Delta$ <i>cwlD</i> in HB101/pRK24                                                                                                                                                                           | This study       |
| 1944                                                                  | pMTL-YN3- $\Delta$ <i>pdaA</i>                                           | pMTL-YN3- $\Delta$ <i>pdaA</i> in HB101/pRK24                                                                                                                                                                           | This study       |
| 1969                                                                  | pMTL-YN1C- <i>cwlD</i>                                                   | pMTL-YN1C- <i>cwlD</i> in HB101/pRK24                                                                                                                                                                                   | This study       |
| 1970                                                                  | pMTL-YN1C- <i>pdaA</i>                                                   | pMTL-YN1C- <i>pdaA</i> in HB101/pRK24                                                                                                                                                                                   | This study       |
| 2045                                                                  | pET22b- $\Delta$ 25- <i>cwlD</i> -His <sub>6</sub>                       | pET22b- <i>cwlD</i> (deletion of N-terminal 25 aa with His <sub>6</sub> tag) in BL21(DE3)                                                                                                                               | This study       |
| 2072                                                                  | pET22b- $\Delta$ 25- <i>cwlD</i> -His <sub>6</sub> + pET29a-empty vector | Co-expression of pET22b- <i>cwlD</i> (deletion of N-terminal 25 aa with His <sub>6</sub> tag) with pET29a-empty vector in BL21(DE3)                                                                                     | This study       |

|      |                                                                                            |                                                                                                                                                                             |            |
|------|--------------------------------------------------------------------------------------------|-----------------------------------------------------------------------------------------------------------------------------------------------------------------------------|------------|
| 2073 | pET22b- $\Delta$ 25- <i>cwID</i> -His <sub>6</sub> + pET29a- $\Delta$ 22- <i>gerS</i> +TAA | Co-expression of pET22b- <i>cwID</i> (deletion of N-terminal 25 aa with His <sub>6</sub> tag) with pET29a- <i>gerS</i> (untagged deletion of N-terminal 26 aa) in BL21(DE3) | This study |
| 2074 | pET22b- $\Delta$ 25- <i>cwID</i> -His <sub>6</sub> + pET28a- <i>cspBA</i> +TAA             | Co-expression of pET22b- <i>cwID</i> (deletion of N-terminal 25 aa with His <sub>6</sub> tag) with pET28a- <i>cspBA</i> (untagged) in BL21(DE3)                             | This study |

**Plasmids**

pET22b  
pET28a  
pET29a  
pK424

**Relevant features**

*amp*  
*kan*  
*kan*  
Tra<sup>+</sup> Mob<sup>+</sup>; *bla*, *tet*

Novagen  
Novagen  
Novagen  
C. Ellermeier

## References

1. Ng YK, Ehsaan M, Philip S, Collery MM, Janoir C, Collignon A, et al. Expanding the repertoire of gene tools for precise manipulation of the *Clostridium difficile* genome: allelic exchange using *pyrE* alleles. PLoS One. 2013;8(2):e56051. doi: 10.1371/journal.pone.0056051. PubMed PMID: 23405251; PubMed Central PMCID: PMC3566075.
2. Donnelly ML, Li W, Li YQ, Hinkel L, Setlow P, Shen A. A *Clostridium difficile*-Specific, Gel-Forming Protein Required for Optimal Spore Germination. mBio. 2017;8(1). Epub 2017/01/17. doi: 10.1128/mBio.02085-16. PubMed PMID: 28096487; PubMed Central PMCID: PMC5241399.
3. Fimlaid KA, Jensen O, Donnelly ML, Francis MB, Sorg JA, Shen A. Identification of a Novel Lipoprotein Regulator of *Clostridium difficile* Spore Germination. PLoS Pathog. 2015;11(10):e1005239. doi: 10.1371/journal.ppat.1005239. PubMed PMID: 26496694; PubMed Central PMCID: PMC4619724.
