# Supplementary material for: Clostridium difficile Lipoprotein GerS Is Required for Cortex Modification and Thus Spore Germination
Source: PubMed Central journal article supplement (PMC6021603; doi:10.1128/msphere.00205-18), 2018-06-27
Supplement: sph003182575st3.pdf [file sph003182575st3.pdf]

**Table S3. Primers used in this study.**

| Primer | Name                                                    | Sequence                                                                      |
|--------|---------------------------------------------------------|-------------------------------------------------------------------------------|
| 1278   | 5' NdeI <i>gerS</i> truncation                          | AGCC <b><u>CATATG</u></b> CAAAAACGACAGTCCAC                                   |
| 1458   | 5' NdeI <i>pdaA</i> start                               | ATAC <b><u>CATATG</u></b> AAAAAAGATAGCCTAAAAAATACATTATGATAGG                  |
| 1459   | 3' XhoI <i>pdaA</i> no stop                             | AAT <b><u>CTCGAG</u></b> TTTTTTATTATTTAAATAATCAAGTGTTTAAGTTTATAACCTTC         |
| 1505   | 5' NcoI <i>cspB</i> codon opt                           | ATAC <b><u>CCATGG</u></b> CTATTATCATTAAATTACGAACTGATTGTGAAGTAC                |
| 1507   | 5' linker <i>cspA</i> SOE                               | GACGAGGAAAAATAGCTACAAGTTTATCGATGGATACAACATTCAGATTCATAACGATC                   |
| 1508   | 3' XhoI <i>cspA</i> codon opt no stop                   | AAT <b><u>CTCGAG</u></b> GGCGCAGTACATCAAACATGCCACG                            |
| 1529   | 3' HindIII <i>cspBA</i> CO 2439                         | TTTGAAGCTTTTATTAATGCTGCGATAGCC                                                |
| 1530   | 5' HindIII <i>cspBA</i> linker 2482                     | TAAAAGCTTCAAAGACGAGGAAAAATAGCTACAAGTTTATCGATGGA                               |
| 1625   | 3' XhoI <i>cspBA</i> codon opt with stop                | AAT <b><u>CTCGAG</u></b> TTAGCGCAGTACATCAAACATGCCACG                          |
| 1900   | 3' XhoI <i>gerS</i> +TAA                                | AAT <b><u>CTCGAG</u></b> TTAGTTTCTGTATTCAAATCTTTGTATTTTAC                     |
| 2003   | 5' <i>gerS</i> flank                                    | GCTTAGTTGTGTAGTATAAT                                                          |
| 2004   | 3' <i>gerS</i> flank                                    | GTATAACCTCATCTCCA                                                             |
| 2005   | 5' SOE $\Delta$ <i>gerS</i>                             | GACCATAGTATGTATTATGTTCTTGGCAGTAAAATACAAAGATTTTGAATACAGAAAC                    |
| 2006   | 3' rev oes $\Delta$ <i>gerS</i>                         | GTTTCTGTATTCAAATCTTTGTATTTTACTGCCAAGAACATAATACATACTATGGTC                     |
| 2007   | 5' AscI $\Delta$ <i>gerS</i> Gibson                     | GTCAATTGTTCAAAAAAATAATGGCG <b><u>GCGCGC</u></b> GCTTAGTTGTGTAGTATAATA         |
| 2008   | 3' SbfI $\Delta$ <i>gerS</i> Gibson                     | AGCAAGGCAAGACCGATCGGGCC <b><u>CTGCAGG</u></b> CTTTGTCAATTCTAACCA              |
| 2181   | 5' NotI <i>gerS</i>                                     | GGAATTAGGGATGTAATAA <b><u>GCGGCCG</u></b> CCAGTTGTAGATTCAGAGAATAGAGTTG        |
| 2182   | 3' XhoI CD3464 Gibson                                   | GCCAAGCTTGCATGTCTGCAGGC <b><u>CTCGAG</u></b> TTAGTTTCTGTATTCAAATCTTTGTATTTT   |
| 2362   | 5' NotI <i>cwID</i> 263                                 | GGAATTAGGGATGTAATAA <b><u>GCGGCCG</u></b> CATAAGGTTATATATTTTAAAGATATTATTTAAC  |
| 2387   | 5' <i>cwID</i> flank 850                                | GCTAGAGTAAGACTAGTTGCAGGTG                                                     |
| 2388   | 3' <i>cwID</i> flank 861                                | GCTAGAGTAAGACTAGTTGCAGGTG                                                     |
| 2389   | 5' AscI $\Delta$ <i>cwID</i> YN3                        | GTCAATTGTTCAAAAAAATGGC <b><u>GCGCGCC</u></b> GACATTAATAAGAGATGTTAAACAACC      |
| 2390   | 5' $\Delta$ <i>cwID</i> SOE                             | GCAATGATATGTCTAGTAGTATCCGAGTGAAACTCTTAACTGATGAAACA                            |
| 2391   | 3' $\Delta$ <i>cwID</i> rev eos                         | TGTTTCATCAGTTAAGAGTTTACACTCGGATACTACTACTAGACATATCATTGC                        |
| 2392   | 3' SbfI $\Delta$ <i>cwID</i> YN3                        | AGCAAGGCAAGACCGATCGGGCC <b><u>CTGCAGG</u></b> TCATTATCTTCCCTTGAGGACAGAG       |
| 2408   | 3' XhoI <i>gerS-<math>\Delta</math>lr2</i>              | CAAGCTTGCATGTCTGCAGGC <b><u>CTCGAG</u></b> TTATTTTAGCAAATAACTGTTTATTTG        |
| 2428   | 5' <i>pdaA</i> flank 800                                | GCTCCATTCCCATGTTGGAAG                                                         |
| 2429   | 3' <i>pdaA</i> flank 879                                | CATAGAAGGAGGATATCTGCTTG                                                       |
| 2430   | 5' AscI $\Delta$ <i>pdaA</i> YN3 Gibson                 | GTCAATTGTTCAAAAAAATAATGGC <b><u>GCGCGCC</u></b> CTCAATGGCTCCAAAGTAGTTTTTTC    |
| 2431   | 5' $\Delta$ <i>pdaA</i> SOE                             | GCTCTAATACTTTTTGGAATTGCTAGGATGAGGTTCTTACACATTGGG                              |
| 2432   | 3' $\Delta$ <i>pdaA</i> rev eos                         | CCCAATGTGTAAGAACCTCATCCTAGCAATTCCAAAAAGTATTAGAGC                              |
| 2433   | 3' SbfI $\Delta$ <i>pdaA</i> YN3 Gibson                 | GCAAGGCAAGACCGATCGGGCC <b><u>CTGCAGG</u></b> GAAATTTTGGCAATATGTATCACATGAAG    |
| 2450   | 3' XhoI <i>cwID</i> YN1C                                | CAAGCTTGCATGTCTGCAGGC <b><u>CTCGAG</u></b> TCAACTTAAATATTTTGTATTCCCTATGTAG    |
| 2451   | 5' NotI <i>pdaA</i> YN1C                                | CAAGGAATTAGGGATGTAATAA <b><u>GCGGCCG</u></b> CCAGCCTAACTTATTTACAATCATTCTC     |
| 2455   | 5' $\Delta$ <i>cwID</i> internal colony PCR             | GAGCTTATAGAATCAAGTGGTGGCC                                                     |
| 2457   | 3' XhoI <i>pdaA</i> YN1C                                | CAAGCTTGCATGTCTGCAGGC <b><u>CTCGAG</u></b> GGATACAAAGAGATAAATGAATGGAC         |
| 2498   | 5' $\Delta$ <i>pdaA</i> internal colony PCR             | CATCCATCAATGGCAGGTATTAC                                                       |
| 2545   | 5' <i>cwID</i> $_{\Delta 25aa}$ His <sub>6</sub> pET22b | GTTTAACTTTAAGAAGGAGATATAC <b><u>CATATG</u></b> AAAAAATATTTCTGAAGATGTTATCAAG   |
| 2546   | 3' <i>cwID</i> $_{\Delta 25aa}$ His <sub>6</sub> pET22b | GCTCGAGTGCGGCCGCAAGCTT <b><u>GTCGAC</u></b> ACTTAAATATTTTTGTATTCCCTATGTAGATTG |

Restriction sites are underlined and in bold.
